# Supplementary material for: DFT study of Pd-doped ZrCl2: a promising solution for dissolved gas molecule analysis in transformer oil
Source: Royal Society of Chemistry journal article supplement (doi:10.1039/d4cp04151h), 2025-01-01
Supplement: d4cp04151h1.pdf [file d4cp04151h1.pdf]

## Supplementary Data

### DFT Study of Pd-doped $\text{ZrCl}_2$ : A Promising Solution for Dissolved Gas Molecules Analysis in Transformer Oil

Yashasvi Naik, Disha Mehta, H. R. Mahida, Riddhi Desai, and P. B. Thakor\*

*Department of Physics, Veer Narmad South Gujarat University, Surat, Gujarat, 395007, India*

\*Corresponding Author: P. B. Thakor

Email: [pbthakor@rediffmail.com](mailto:pbthakor@rediffmail.com)

- Study into the adsorption properties of targeted gases on Vacant  $\text{ZrCl}_2$  ML:

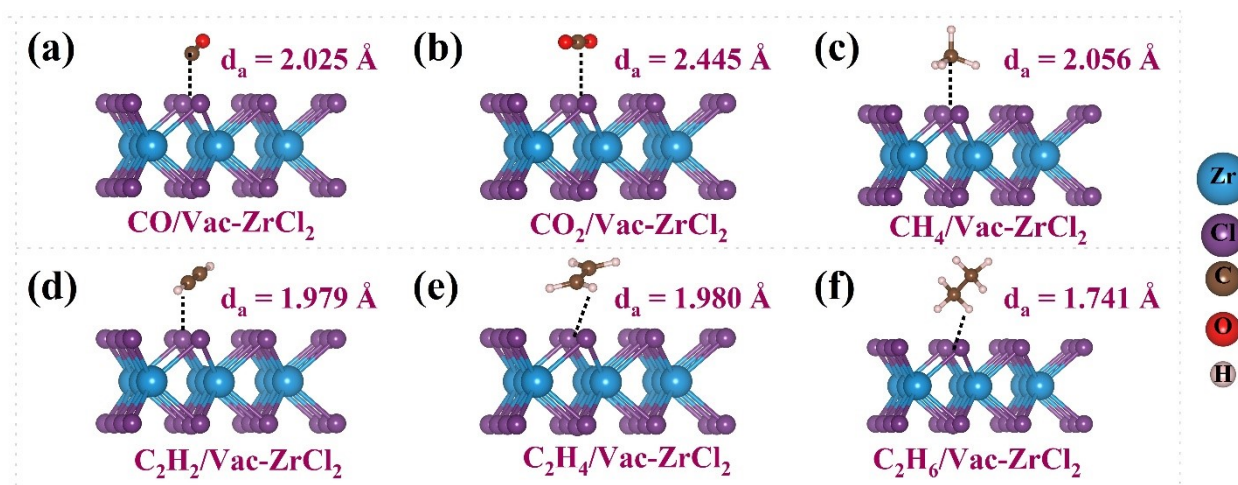

Figure S1: Stable structure of all gas molecules on Vacant  $\text{ZrCl}_2$  ML

**Table-S1:** Adsorption energies  $E_{\text{ads}}$  (eV), Adsorption distance  $d$  (Å), of gas molecules adsorbed on the Vacant  $\text{ZrCl}_2$  ML

| System                        | CO     | CO <sub>2</sub> | CH <sub>4</sub> | C <sub>2</sub> H <sub>2</sub> | C <sub>2</sub> H <sub>4</sub> | C <sub>2</sub> H <sub>6</sub> |
|-------------------------------|--------|-----------------|-----------------|-------------------------------|-------------------------------|-------------------------------|
| Vacancy on $\text{ZrCl}_2$ ML |        |                 |                 |                               |                               |                               |
| $d_a$ (Å)                     | 2.025  | 2.445           | 2.056           | 1.979                         | 1.980                         | 1.741                         |
| $E_{\text{ads}}$ (eV)         | -0.174 | -0.197          | -0.173          | -0.195                        | -0.235                        | -0.234                        |

- **Spin-polarized Density of States:**

The spin-polarized density of states (DOS) for the pristine  $\text{ZrCl}_2$  and Pd- $\text{ZrCl}_2$  MLs reveal no noticeable spin-splitting between the up-spin and down-spin channels. This indicates that

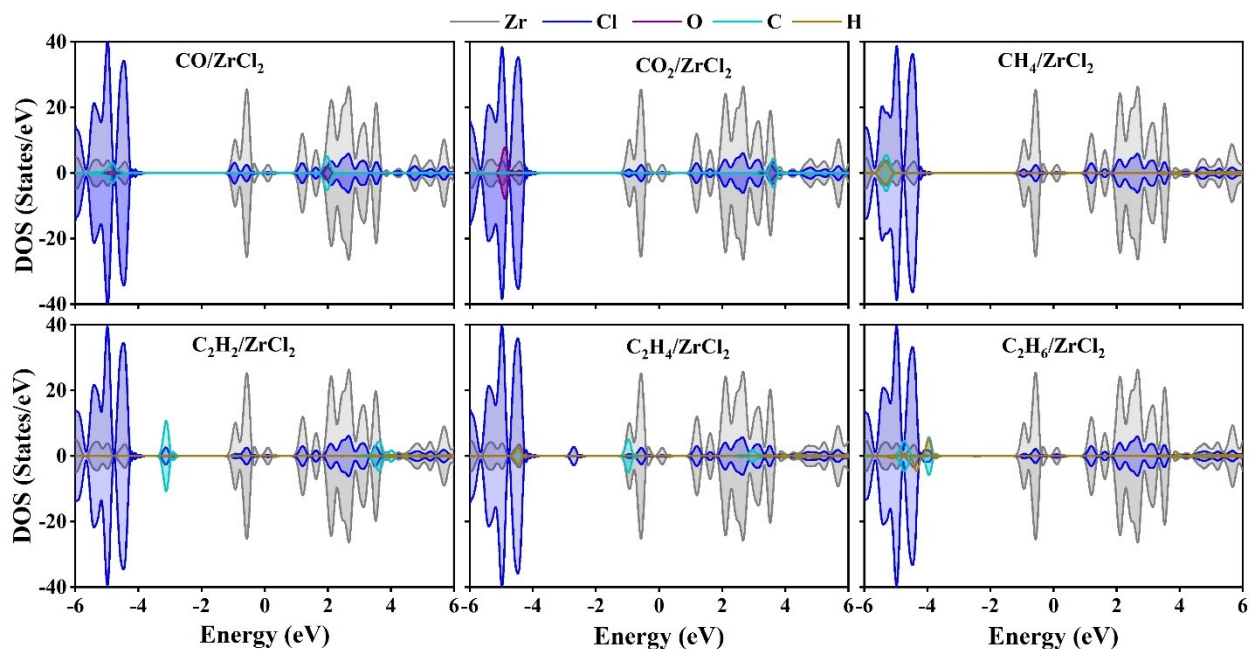

Figure S2(a): Spin-polarized DOS of all gases on  $\text{ZrCl}_2$  ML

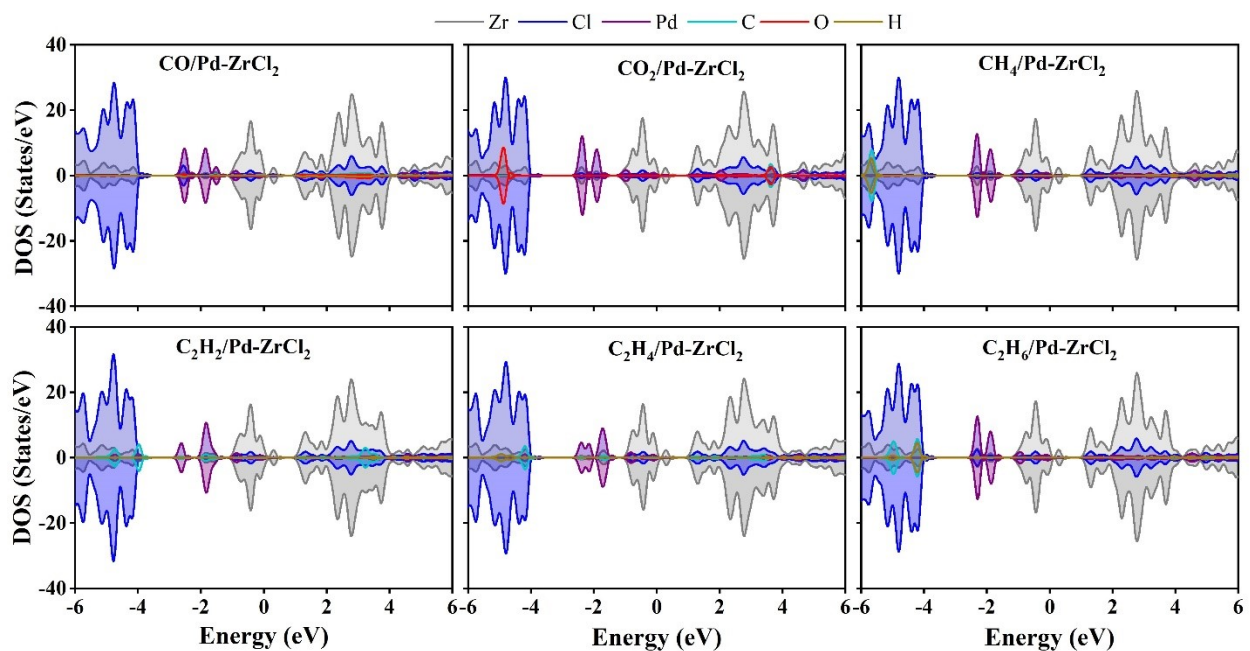

Figure S2(b): Spin-polarized DOS of all gases on Pd- $\text{ZrCl}_2$  ML

the material is non-magnetic, justifying the exclusion of spin effects in adsorption energy calculations.
